# Supplementary material for: Efficient blue CsPb(Br–Cl)3 nanoparticles enabled by strontium halide and amine halide synergetic optimization
Source: Royal Society of Chemistry journal article supplement (doi:10.1039/d2tc00796g), 2022-01-01
Supplement: d2tc00796g1.pdf [file d2tc00796g1.pdf]

1

## Supporting Information

### 2 **Efficient blue CsPb(Br-Cl)<sub>3</sub> nanoparticles enabled by strontium** 3 **halides and amine halides synergetic optimization**

4 Runda Guo<sup>a</sup>, Weizhuo Zhang<sup>a, b</sup>, Xin Li<sup>a</sup>, Linyuan Lian<sup>b</sup>, Hongting Chen<sup>a</sup>, Chencheng  
5 Peng<sup>a</sup>, Liang Sun<sup>a</sup>, ShiyuanLiu<sup>c</sup>, Jianbing Zhang<sup>b\*</sup> and Lei Wang<sup>a\*</sup>

6 <sup>a</sup> *Wuhan National Laboratory for Optoelectronics, Huazhong University of Science and*  
7 *Technology, Wuhan 430074, China*

8 <sup>b</sup> *School of Optical and Electronic Information, Huazhong University of Science and Technology,*  
9 *Wuhan 430074, China*

10 <sup>c</sup> *State Key Laboratory of Digital Manufacturing Equipment and Technology, Huazhong University*  
11 *of Science and Technology, Wuhan 430074, China*

### 12 **Corresponding Author**

13 *\*E-mail: jbzhang@mail.hust.edu.cn; wanglei@mail.hust.edu.cn*

14

15

16 **Table S1.** The PLQY of CsPb(Br-Cl)<sub>3</sub> perovskite NPs with different ratios of NH<sub>4</sub><sup>+</sup>/Cs<sup>+</sup>  
17 (*R*).

| Samples      | PLQY |
|--------------|------|
| <i>R=0</i>   | 5%   |
| <i>R=10%</i> | 12%  |
| <i>R=20%</i> | 13%  |
| <i>R=40%</i> | 12%  |

18

19 **Table S2.** ICP-OES analysis of strontium-based NPs.

| Samples | Sr <sup>2+</sup> /Pb <sup>2+</sup> |
|---------|------------------------------------|
| Sr-0.1  | 0.6%                               |
| Sr-0.3  | 1.54%                              |
| Sr-0.5  | 3.6%                               |

20

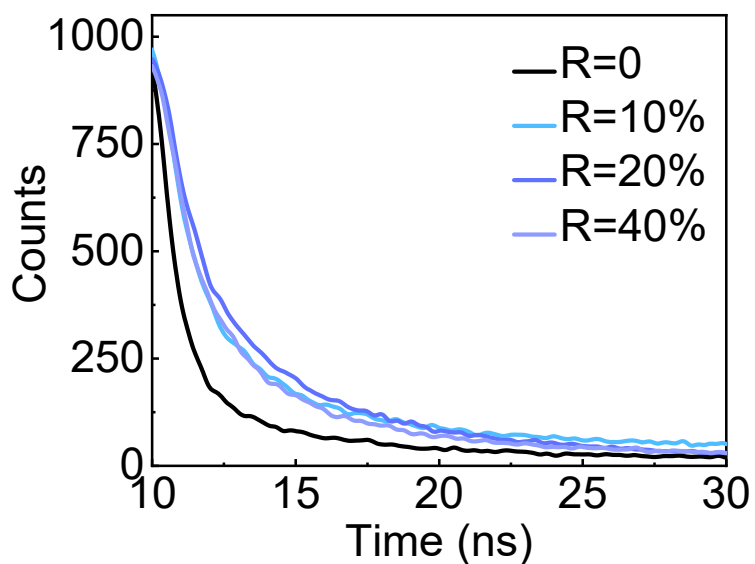

21

22 **Figure S1.** Time-resolved PL spectra for CsPb(Br-Cl)<sub>3</sub> perovskite NPs with different  
23 ratios of NH<sub>4</sub><sup>+</sup>/Cs<sup>+</sup> (*R*).

24

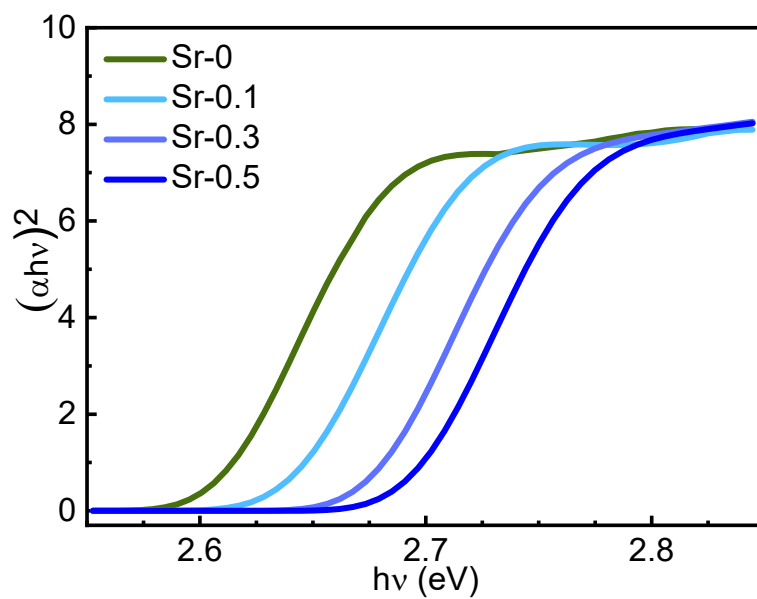

25

26 **Figure S2.** Tauc plot of Sr-j samples.

27

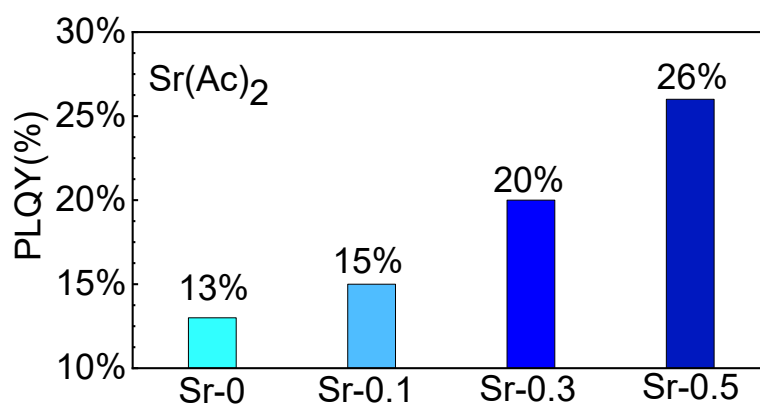

28

29 **Figure S3.** Absolute PLQYs of Sr-j based on Sr(Ac)<sub>2</sub>.

30

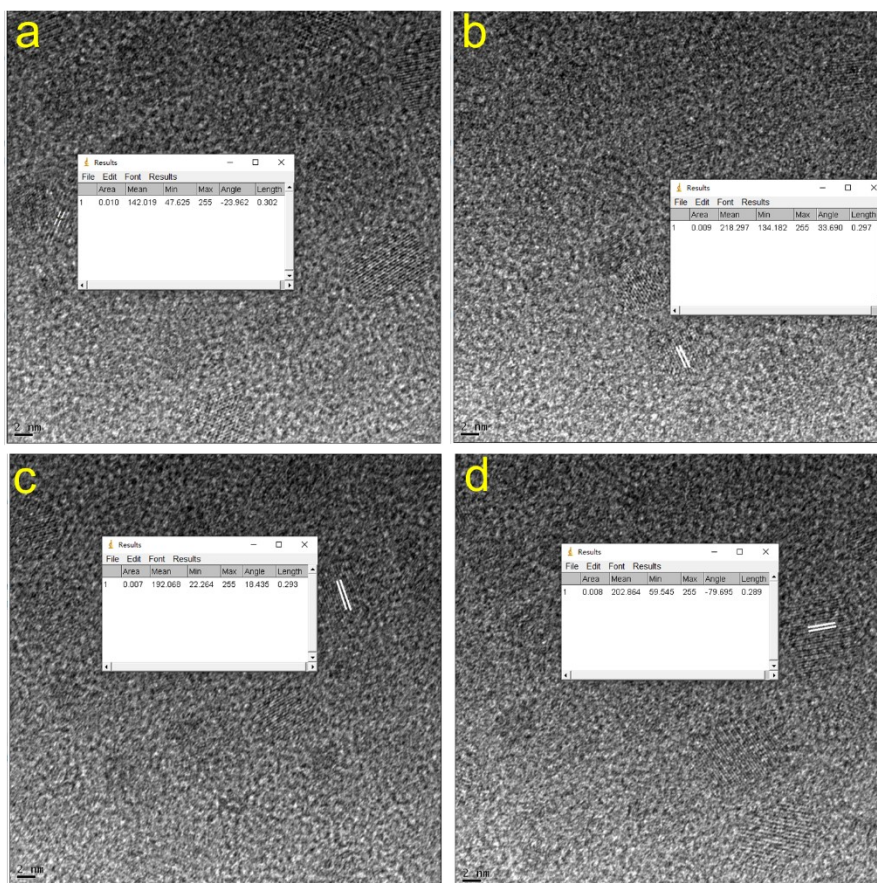

31

32 **Figure S4.** HRTEM images of Sr-j (0, 0.1, 0.3, 0.5).

33

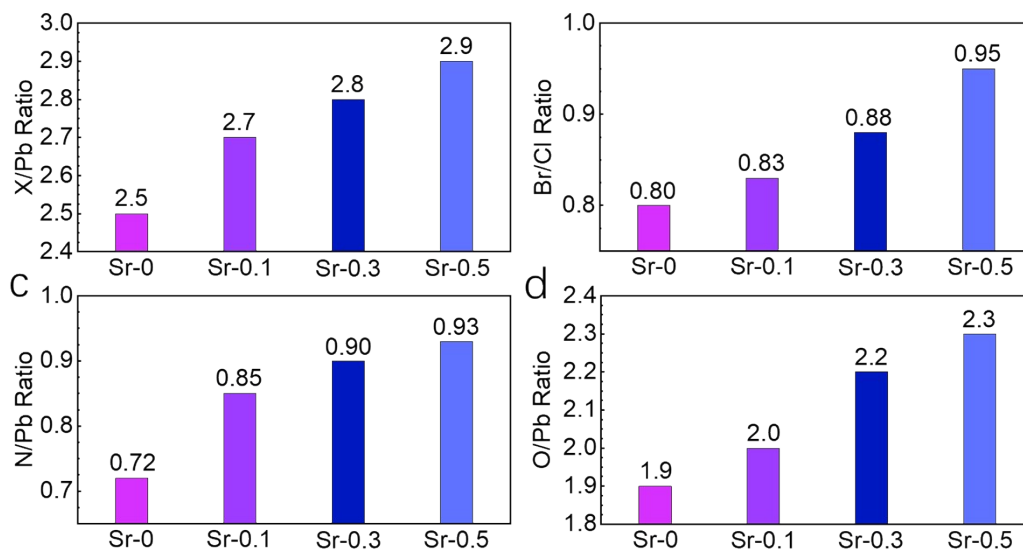

34

35 **Figure S5.** Quantitative XPS results of Sr-j, for (a) X to Pb ratio (b) Br to Cl ratio (c)

36 N to Pb ratio (d) O to Pb ratio.

37

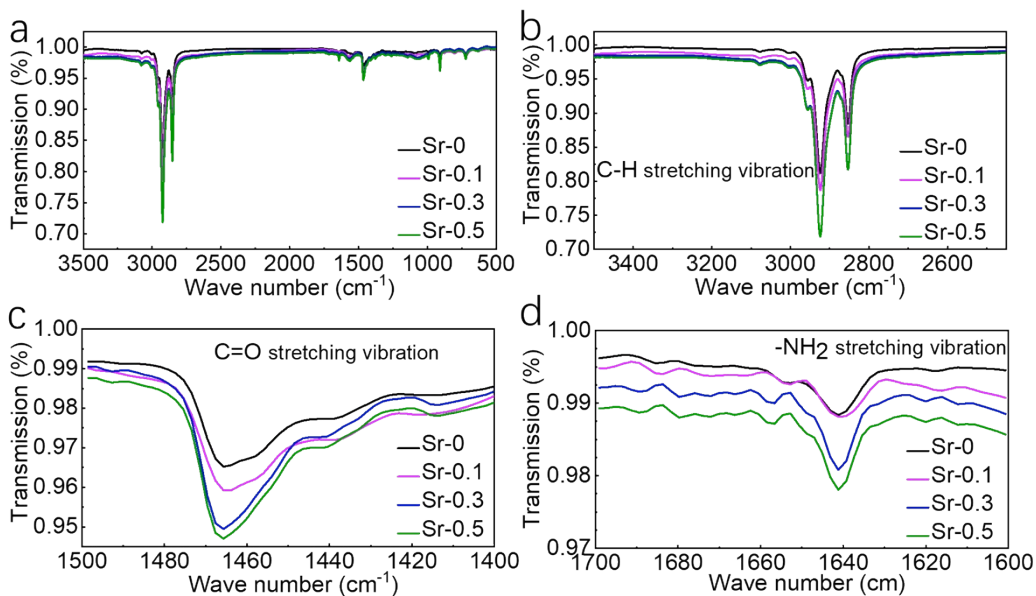

38

39 **Figure S6.** Fourier transform infrared spectroscopy (FTIR) spectra of Sr-j.

40

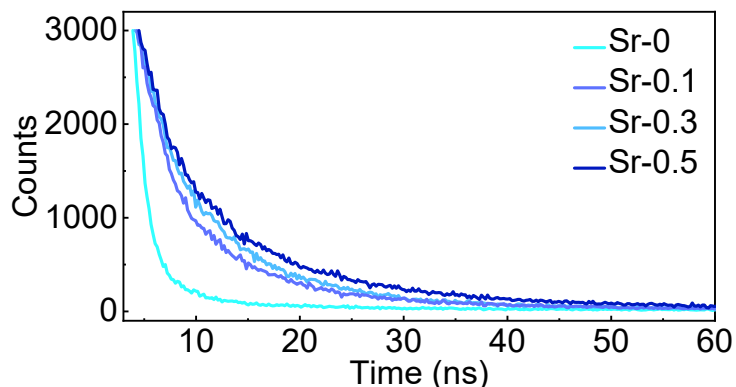

41

42 **Figure S7.** Time-resolved PL spectra of Sr-j.

43

44 **Table S3.** Summary of the time-resolved PL decay fitting parameters of Sr-j.

| Samples | PLQY (%) | $A_1$  | $\tau_1$ (ns) | $A_2$  | $\tau_2$ (ns) | $\tau_{avg}$ (ns) |
|---------|----------|--------|---------------|--------|---------------|-------------------|
| Sr-0    | 13%      | 0.9936 | 1.328         | 0.0064 | 10.382        | 1.764             |
| Sr-0.1  | 29%      | 0.8469 | 3.323         | 0.1531 | 11.981        | 6.739             |
| Sr-0.3  | 48%      | 0.7216 | 4.043         | 0.2784 | 11.164        | 7.716             |
| Sr-0.5  | 60%      | 0.7597 | 4.018         | 0.2403 | 14.809        | 9.827             |

45

46 **Table S4.** Summary of the corresponding fs-TA time constants of Sr-0 and Sr-0.5.

| Samples | P <sub>1</sub> | $\tau_1$ (ps) | P <sub>2</sub> | $\tau_2$ (ps) | P <sub>3</sub> | $\tau_3$ (ns) |
|---------|----------------|---------------|----------------|---------------|----------------|---------------|
| Sr-0    | 0.828          | 1.393         | 0.060          | 48.297        | 0.112          | 3098.029      |
| Sr-0.5  | 0.532          | 22.227        | 0.194          | 240.236       | 0.274          | 3580.387      |

47

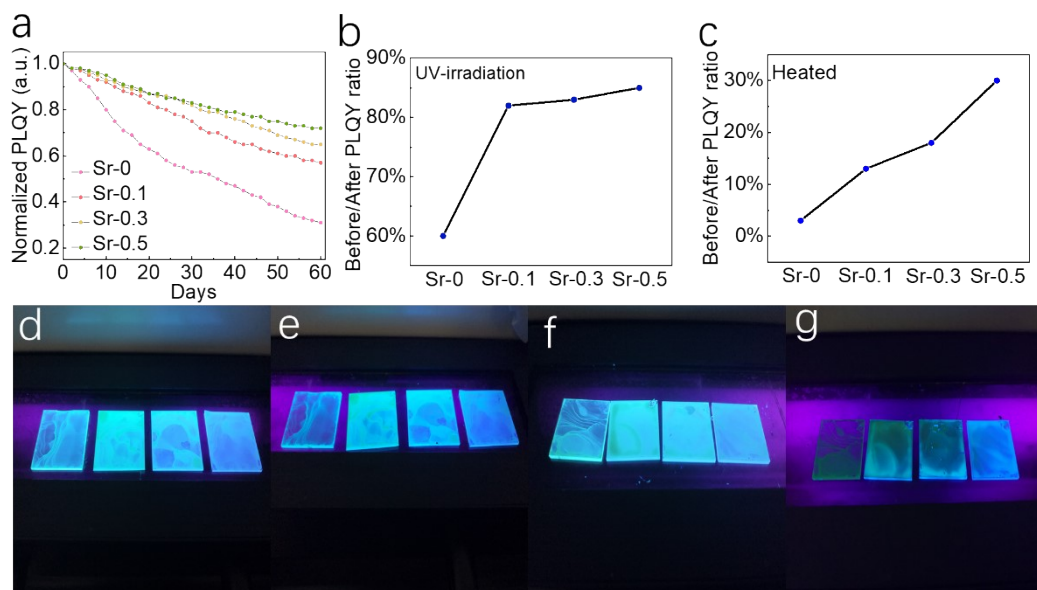

48

49 **Figure S8.** PLQY record for Sr-j samples (a) varied with days under atmosphere  
50 condition, (b) remained after continuous UV-irradiation and (c) remained after heated.  
51 (d, e) Images of Sr-j before, after UV irradiation. (f, g) Images of Sr-j before, after  
52 thermally treated on the hot plate.

53

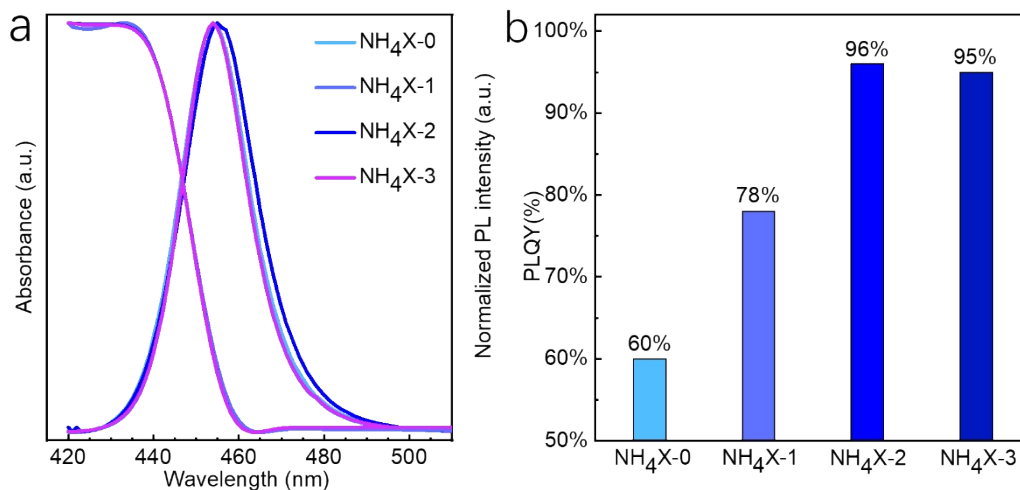

54

55 **Figure S9.** (a) Normalized PL and optical absorption spectra of each NH<sub>4</sub>X-m NPs

56 sample. (b) Absolute PLQYs of NH<sub>4</sub>X-m.

57

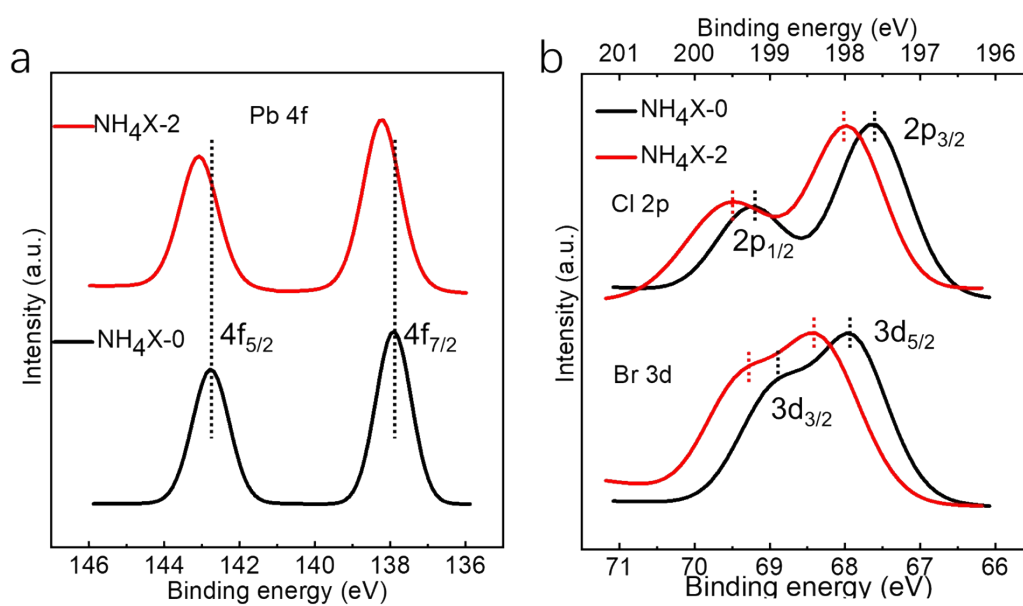

58

59 **Figure S10.** XPS spectra of NH<sub>4</sub>X-0 and NH<sub>4</sub>X-2 samples.

60

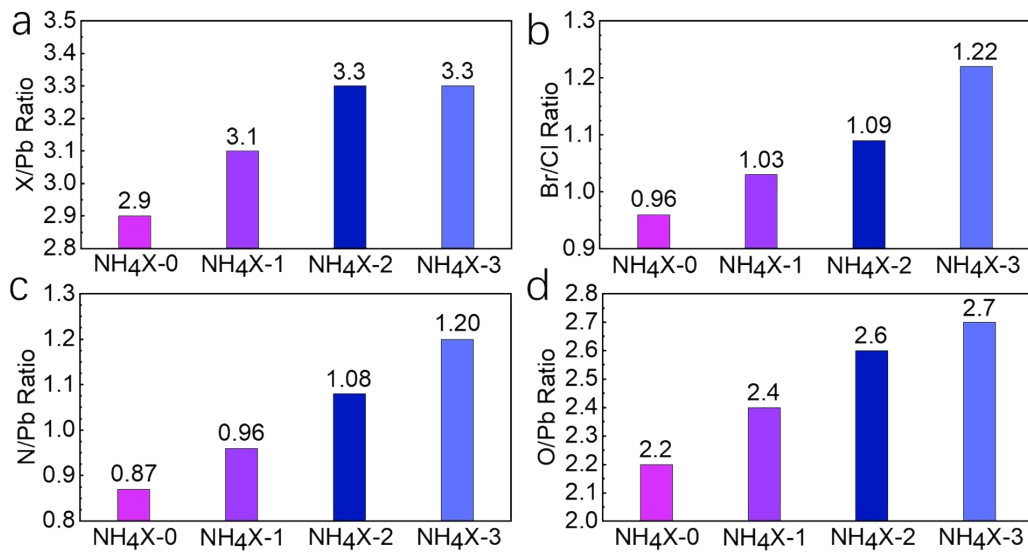

61

62 **Figure S11.** Quantitative XPS results of NH<sub>4</sub>X-m, for (a) X to Pb ratio (b) Br to Cl

63 ratio (c) N to Pb ratio (d) O to Pb ratio.

64

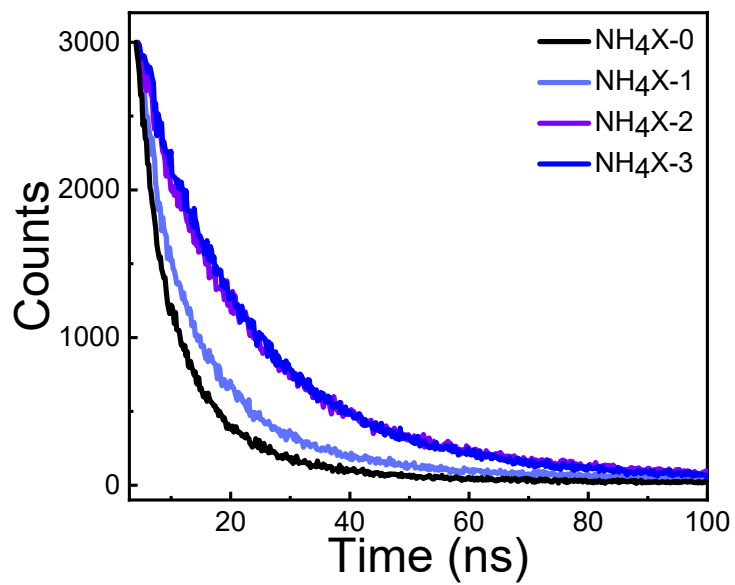

65

66 **Figure S12.** Time-resolved PL spectra of NH<sub>4</sub>X-m.

67

68

69

70

71

72



73 **Table S5.** Summary of the time-resolved PL decay fitting parameters of NH<sub>4</sub>X-m.

| Samples             | PLQY (%) | A <sub>1</sub> | τ <sub>1</sub> (ns) | A <sub>2</sub> | τ <sub>2</sub> (ns) | τ <sub>avg</sub> (ns) |
|---------------------|----------|----------------|---------------------|----------------|---------------------|-----------------------|
| NH <sub>4</sub> X-0 | 60%      | 0.7906         | 4.261               | 0.2094         | 14.172              | 8.902                 |
| NH <sub>4</sub> X-1 | 78%      | 0.7605         | 6.119               | 0.2395         | 19.759              | 12.997                |
| NH <sub>4</sub> X-2 | 96%      | 0.7762         | 14.883              | 0.2238         | 32.202              | 21.537                |
| NH <sub>4</sub> X-3 | 95%      | 0.6510         | 12.409              | 0.3490         | 29.743              | 22.157                |

74

75 **Table S6.** List of some reported blue perovskite NPs performance.

| Samples                                                      | Peak (nm) | PLQY (%) |
|--------------------------------------------------------------|-----------|----------|
| MAPbCl <sub>0.5</sub> Br <sub>2.5</sub>                      | 458       | 38.4%    |
| CsPbCl <sub>1.5</sub> Br <sub>1.5</sub>                      | 455       | 37%      |
| CsPbBr <sub>3</sub> : Al <sup>3+</sup>                       | 456       | 42%      |
| CsPbBr <sub>3</sub> : Cd <sup>2+</sup>                       | 452       | 60%      |
| CsPb <sub>0.93</sub> Cu <sub>0.07</sub> (Br/Cl) <sub>3</sub> | 455       | 80%      |
| CsPbBr <sub>3</sub> : xNd <sup>3+</sup>                      | 459       | 90%      |
| <b>This work</b>                                             | 455       | 96%      |

76

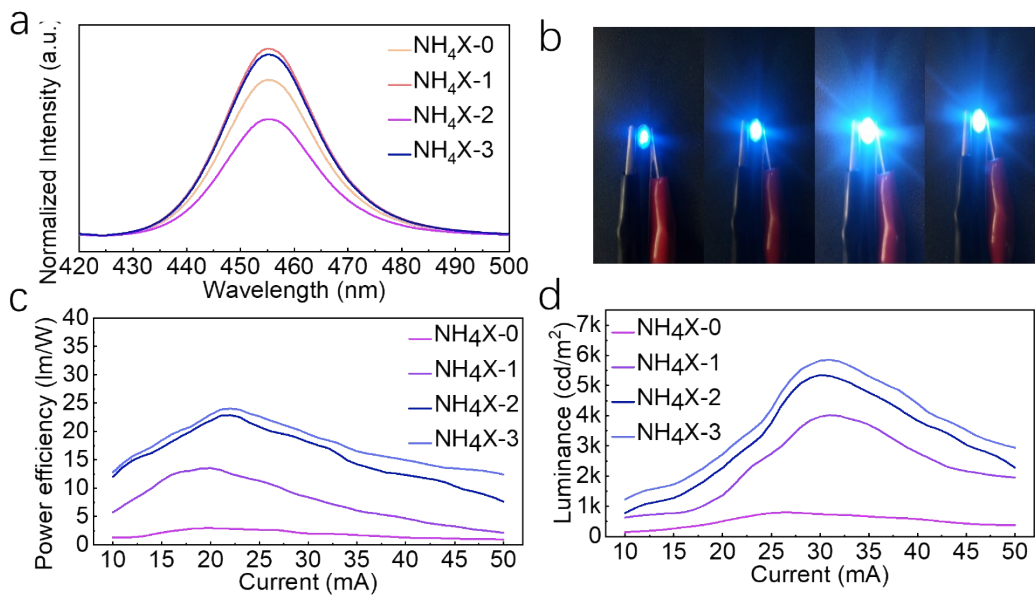

77

78 **Figure S13.** (a) PL spectra of blue device based on NH<sub>4</sub>X-m. (b) Images for blue  
 79 emitting. (c) Power efficiency vs current curves. (d) Luminescence vs current curves.

80

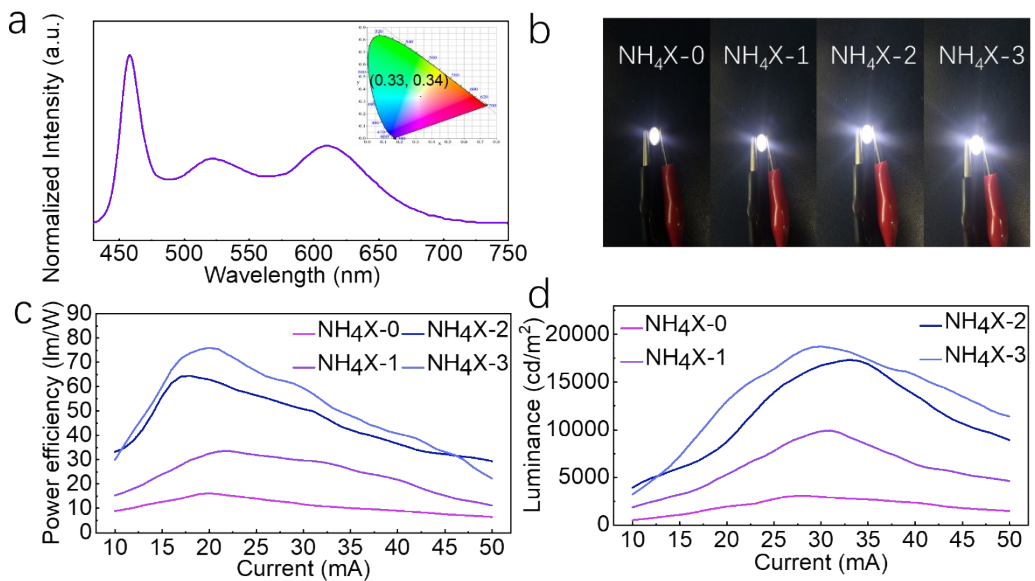

81

82 **Figure S14.** (a) PL spectra of photoluminescent WLED based on NH<sub>4</sub>X-m mixed with  
 83 commercial phosphors (Ca,Sr)AlSiN<sub>3</sub>:Eu and (Sr,Ba)<sub>2</sub>SiO<sub>4</sub>:Eu. (b) Images for white  
 84 emitting. (c) Power efficiency vs current curves. (d) Luminescence vs current curves.

85

86
